# Supplementary material for: A prediction model to identify hospitalised, older adults with reduced physical performance
Source: Springer Nature journal article supplement (doi:10.1186/s12877-017-0671-5), 2017-12-01

Additional file 1

Receiver Operation Characteristic (ROC) for cut-off points

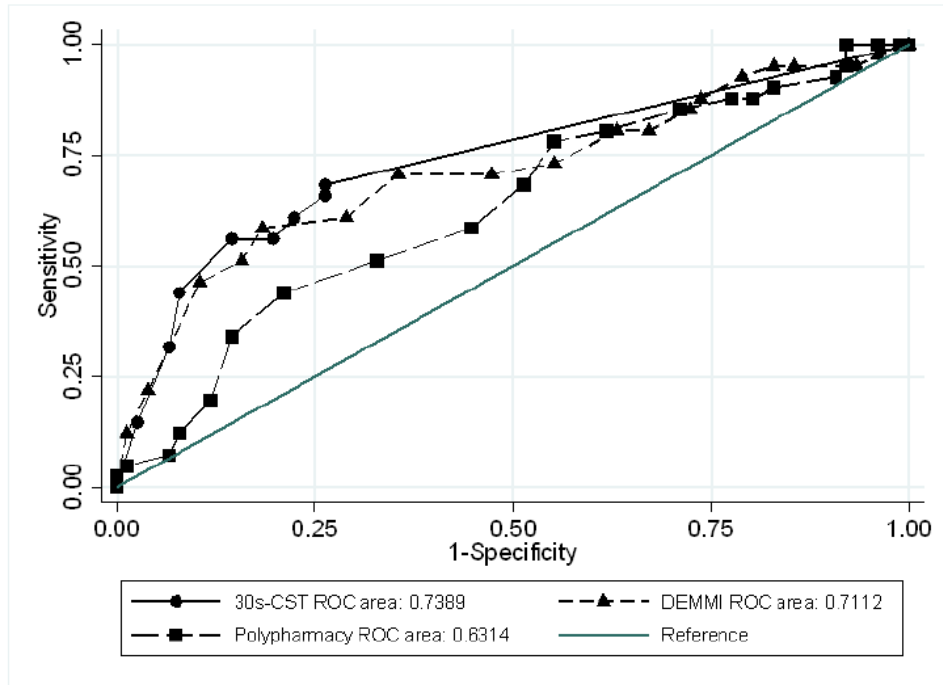

Supplement: MOESM1 [file 15287306]
