# Supplementary material for: A prediction model to identify hospitalised, older adults with reduced physical performance
Source: Springer Nature journal article supplement (doi:10.1186/s12877-017-0671-5), 2017-12-01
Supplement: MOESM2 [file 15287306]

Additional file 2

|                                | Climbing stairs* | Walking aid * | Physically active <sup>1</sup> | 30s-CST <sup>§2</sup> |
|--------------------------------|------------------|---------------|--------------------------------|-----------------------|
| Walking 400 m*                 | r= 0.6           | r=0.1         |                                |                       |
| Walking aid*                   | r=0.3            |               |                                |                       |
| Self-rated health <sup>1</sup> |                  |               | r= 0.1                         |                       |
| DEMMI <sup>§1</sup>            |                  |               |                                | r= 0.6                |

\* Within the domain self-reported mobility

<sup>1</sup> Within the domain self-reported habitual physical status

<sup>§</sup> Within the domain presenting physical performance <sup>1</sup> De Morton Mobility Index (0-100)

<sup>2</sup> 30-second Chair- Stand Test
